# Supplementary material
Source: Elsevier journal article supplement (https://www.sciencedirect.com/science/article/pii/S1413867019304131)
Supplement: mmc1 [file S1413867019304131:mmc1.docx]

Fig. A.1 - Graphic of IgA amount. ELISA optical density of antigen (a) PPD, (b) CFP-10, and (c) ESAT-6. Indicating the serum antibody concentration in active TB and HC group. The results were analyzed as individual data and mean ± SD

(c)

(b)

(a)
